# Supplementary material for: Mdig promotes oncogenic gene expression through antagonizing repressive histone methylation markers
Source: PubMed Central journal article supplement (PMC6929976; doi:10.7150/thno.36220), 2020-01-01
Supplement: thnov10p0602s1.pdf [file thnov10p0602s1.pdf]

sFig. 1

A

CRISPR-cas9 sgRNA sequence:

AATGTGTACATAACTCCCGCAGG

Colonies

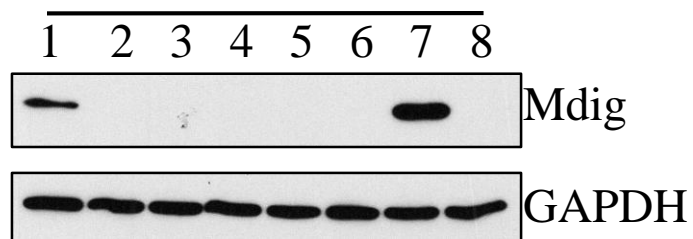

B

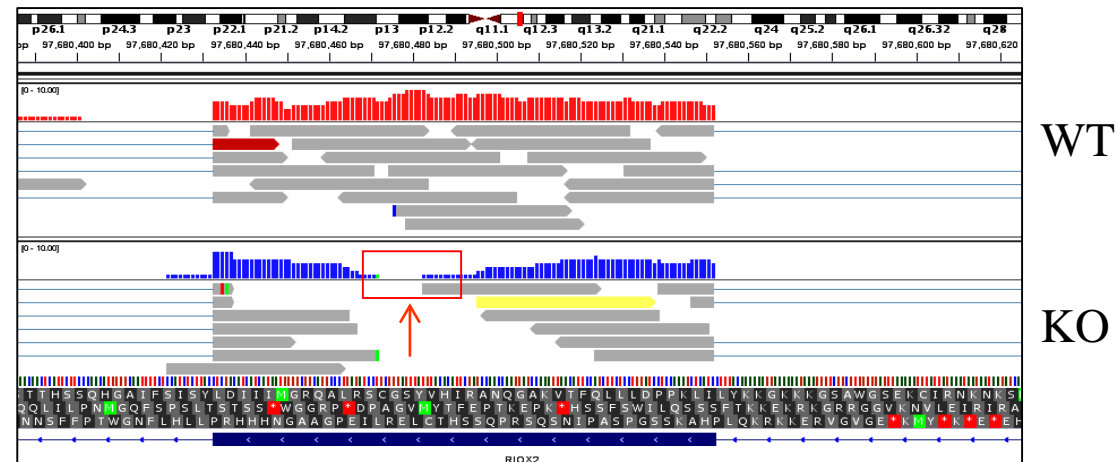

C

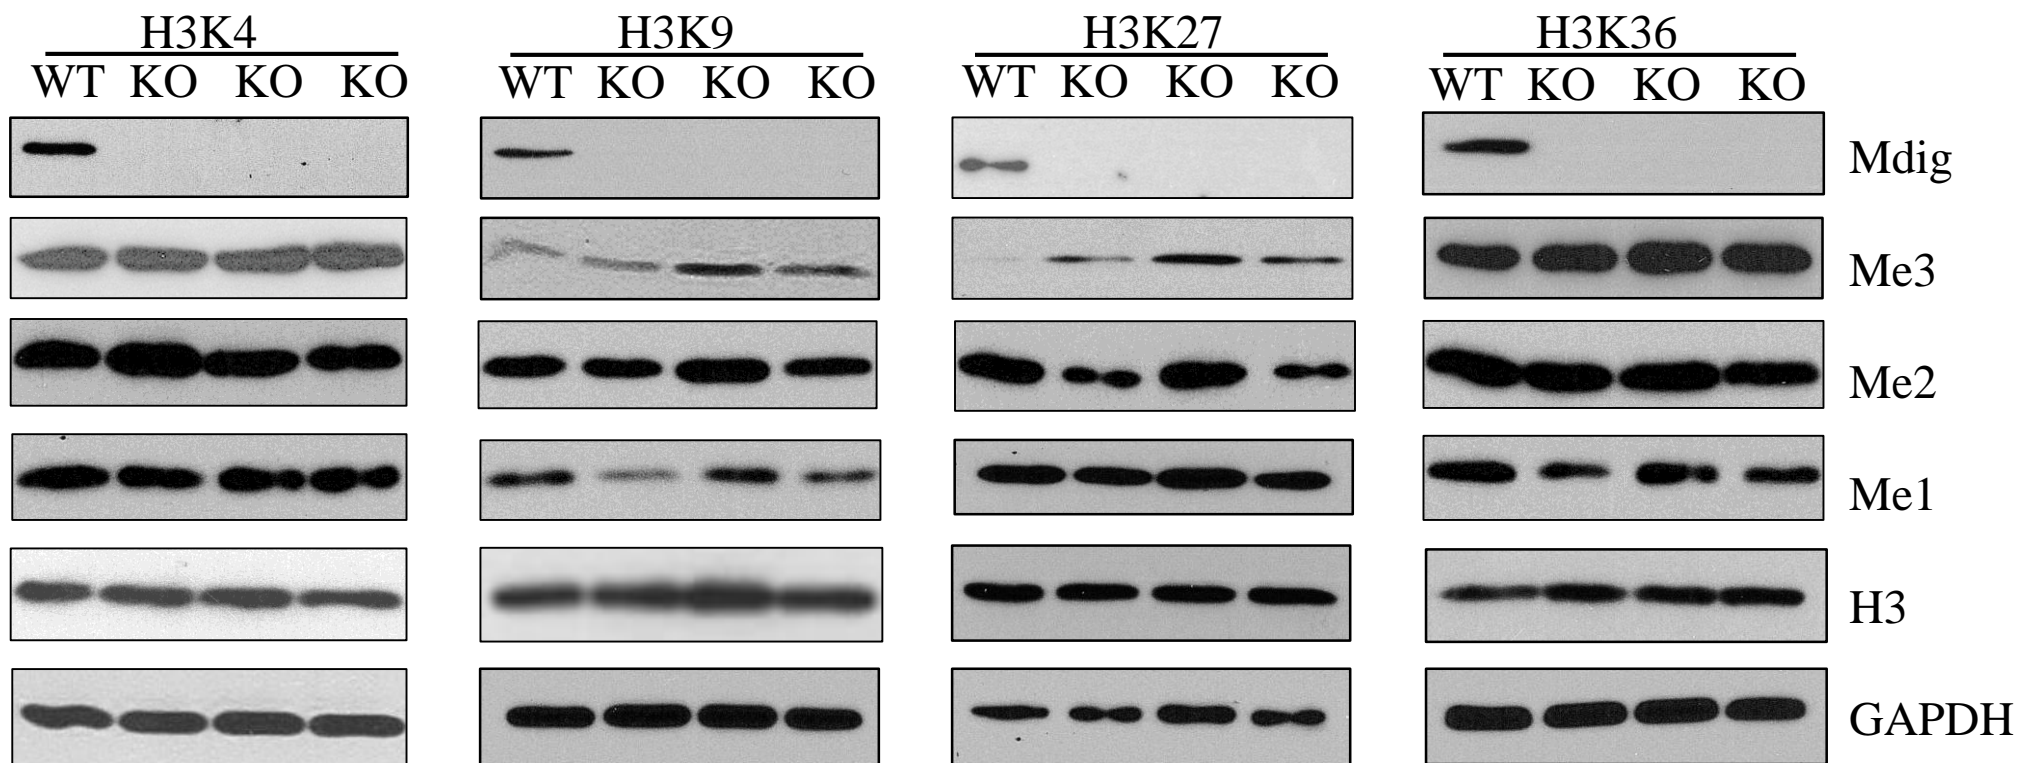

sFig. 2

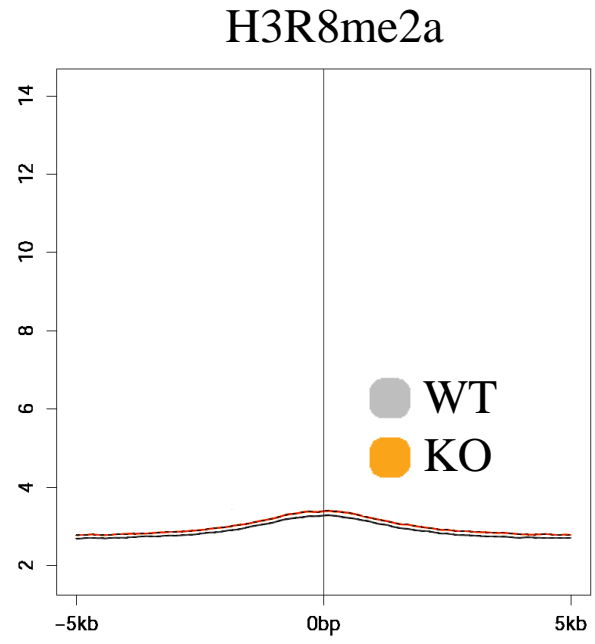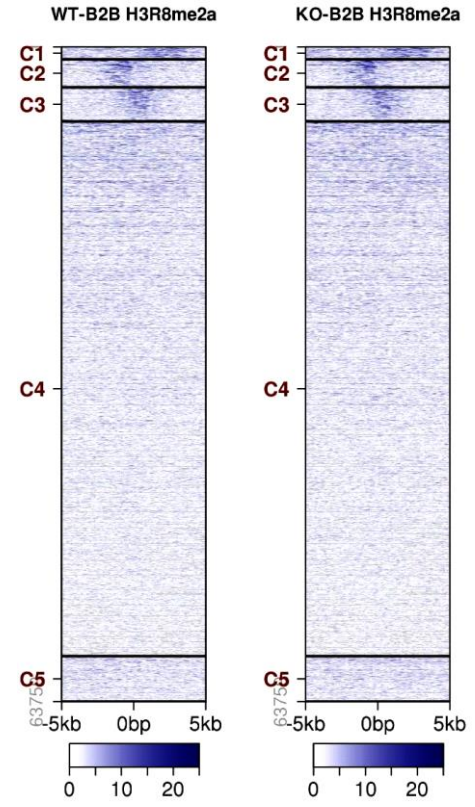

sFig. 3

A

| GO:BP                                          |            | stats                   |                           | »     |
|------------------------------------------------|------------|-------------------------|---------------------------|-------|
| Term name                                      | Term ID    | P <sub>adj</sub>        | $-\log_{10}(p\text{...})$ | ↓ ≤16 |
| anatomical structure development               | GO:0048856 | $6.770 \times 10^{-21}$ |                           |       |
| system development                             | GO:0048731 | $2.161 \times 10^{-20}$ |                           |       |
| multicellular organism development             | GO:0007275 | $2.209 \times 10^{-20}$ |                           |       |
| biological adhesion                            | GO:0022610 | $6.297 \times 10^{-20}$ |                           |       |
| cell adhesion                                  | GO:0007155 | $9.224 \times 10^{-20}$ |                           |       |
| multicellular organismal process               | GO:0032501 | $6.875 \times 10^{-19}$ |                           |       |
| anatomical structure morphogenesis             | GO:0009653 | $1.672 \times 10^{-18}$ |                           |       |
| developmental process                          | GO:0032502 | $4.781 \times 10^{-18}$ |                           |       |
| animal organ morphogenesis                     | GO:0009887 | $8.163 \times 10^{-15}$ |                           |       |
| tissue development                             | GO:0009888 | $3.077 \times 10^{-14}$ |                           |       |
| kidney development                             | GO:0001822 | $1.227 \times 10^{-13}$ |                           |       |
| urogenital system development                  | GO:0001655 | $1.859 \times 10^{-13}$ |                           |       |
| animal organ development                       | GO:0048513 | $2.507 \times 10^{-13}$ |                           |       |
| renal system development                       | GO:0072001 | $4.230 \times 10^{-13}$ |                           |       |
| regulation of multicellular organismal process | GO:0051239 | $1.292 \times 10^{-12}$ |                           |       |
| circulatory system development                 | GO:0072359 | $1.683 \times 10^{-12}$ |                           |       |
| nervous system development                     | GO:0007399 | $6.063 \times 10^{-12}$ |                           |       |
| tube development                               | GO:0035295 | $1.499 \times 10^{-11}$ |                           |       |
| cellular developmental process                 | GO:0048869 | $1.906 \times 10^{-10}$ |                           |       |
| cell differentiation                           | GO:0030154 | $2.356 \times 10^{-10}$ |                           |       |
| heart development                              | GO:0007507 | $6.159 \times 10^{-10}$ |                           |       |
| tube morphogenesis                             | GO:0035239 | $8.210 \times 10^{-10}$ |                           |       |
| tissue morphogenesis                           | GO:0048729 | $9.805 \times 10^{-10}$ |                           |       |
| cellular component morphogenesis               | GO:0032989 | $9.944 \times 10^{-10}$ |                           |       |
| homophilic cell adhesion via plasma membran    | GO:0007156 | $1.510 \times 10^{-9}$  |                           |       |
| extracellular matrix organization              | GO:0030198 | $2.080 \times 10^{-9}$  |                           |       |

B

| GO:MF                                       |            | stats                   |                           | »     |
|---------------------------------------------|------------|-------------------------|---------------------------|-------|
| Term name                                   | Term ID    | P <sub>adj</sub>        | $-\log_{10}(p\text{...})$ | ↓ ≤16 |
| extracellular matrix structural constituent | GO:0005201 | $5.591 \times 10^{-10}$ |                           |       |
| glycosaminoglycan binding                   | GO:0005539 | $1.049 \times 10^{-6}$  |                           |       |
| growth factor binding                       | GO:0019838 | $1.482 \times 10^{-6}$  |                           |       |
| calcium ion binding                         | GO:0005509 | $2.172 \times 10^{-6}$  |                           |       |
| heparin binding                             | GO:0008201 | $1.260 \times 10^{-5}$  |                           |       |
| retinoic acid binding                       | GO:0001972 | $1.670 \times 10^{-5}$  |                           |       |
| signaling receptor binding                  | GO:0005102 | $9.427 \times 10^{-5}$  |                           |       |
| glucuronosyltransferase activity            | GO:0015020 | $1.146 \times 10^{-4}$  |                           |       |
| G-protein beta-subunit binding              | GO:0031681 | $1.446 \times 10^{-4}$  |                           |       |
| sulfur compound binding                     | GO:1901681 | $1.706 \times 10^{-4}$  |                           |       |
| cytoskeletal protein binding                | GO:0008092 | $3.792 \times 10^{-4}$  |                           |       |
| integrin binding                            | GO:0005178 | $1.546 \times 10^{-3}$  |                           |       |
| retinoid binding                            | GO:0005501 | $1.938 \times 10^{-3}$  |                           |       |
| proteoglycan binding                        | GO:0043394 | $2.641 \times 10^{-3}$  |                           |       |
| isoprenoid binding                          | GO:0019840 | $2.641 \times 10^{-3}$  |                           |       |
| channel activity                            | GO:0015267 | $8.425 \times 10^{-3}$  |                           |       |
| passive transmembrane transporter activity  | GO:0022803 | $8.938 \times 10^{-3}$  |                           |       |
| gated channel activity                      | GO:0022836 | $1.143 \times 10^{-2}$  |                           |       |
| voltage-gated channel activity              | GO:0022832 | $1.147 \times 10^{-2}$  |                           |       |
| voltage-gated ion channel activity          | GO:0005244 | $1.147 \times 10^{-2}$  |                           |       |
| insulin-like growth factor binding          | GO:0005520 | $1.224 \times 10^{-2}$  |                           |       |
| collagen binding                            | GO:0005518 | $1.809 \times 10^{-2}$  |                           |       |
| actin binding                               | GO:0003779 | $2.027 \times 10^{-2}$  |                           |       |
| voltage-gated cation channel activity       | GO:0022843 | $2.689 \times 10^{-2}$  |                           |       |
| prostaglandin E receptor activity           | GO:0004957 | $3.175 \times 10^{-2}$  |                           |       |
| thrombin-activated receptor activity        | GO:0015057 | $3.175 \times 10^{-2}$  |                           |       |

sFig. 4

Genes KO vs WT

|                         |      |
|-------------------------|------|
| AURKC <sup>1</sup>      | -2.6 |
| BICC1 <sup>2</sup>      | -7.1 |
| CLEC11A <sup>3</sup>    | -10  |
| CRISPLD1 <sup>4</sup>   | -20  |
| FGFR2 <sup>5</sup>      | -2.4 |
| FLRT3 <sup>6</sup>      | -20  |
| HLF <sup>7</sup>        | -2.1 |
| HOXA7 <sup>8</sup>      | -10  |
| ISL1 <sup>9</sup>       | -2   |
| KIT <sup>10</sup>       | -4   |
| MSC <sup>11</sup>       | -20  |
| PCDH7 <sup>12</sup>     | -20  |
| PDGFB <sup>13</sup>     | -3   |
| PDGFRA <sup>14</sup>    | -2.2 |
| RIPPLY2 <sup>15</sup>   | -10  |
| S1PR1 <sup>16</sup>     | -3.8 |
| SAMD11 <sup>17,18</sup> | -2.3 |
| SOX4 <sup>19</sup>      | -3.6 |
| SPOCK1 <sup>20</sup>    | -7.8 |
| SPOCK3 <sup>21</sup>    | -3.5 |
| WNT5A <sup>22</sup>     | -20  |
| WNT7B <sup>23</sup>     | -2.6 |
| WNT9A <sup>24</sup>     | -2.2 |

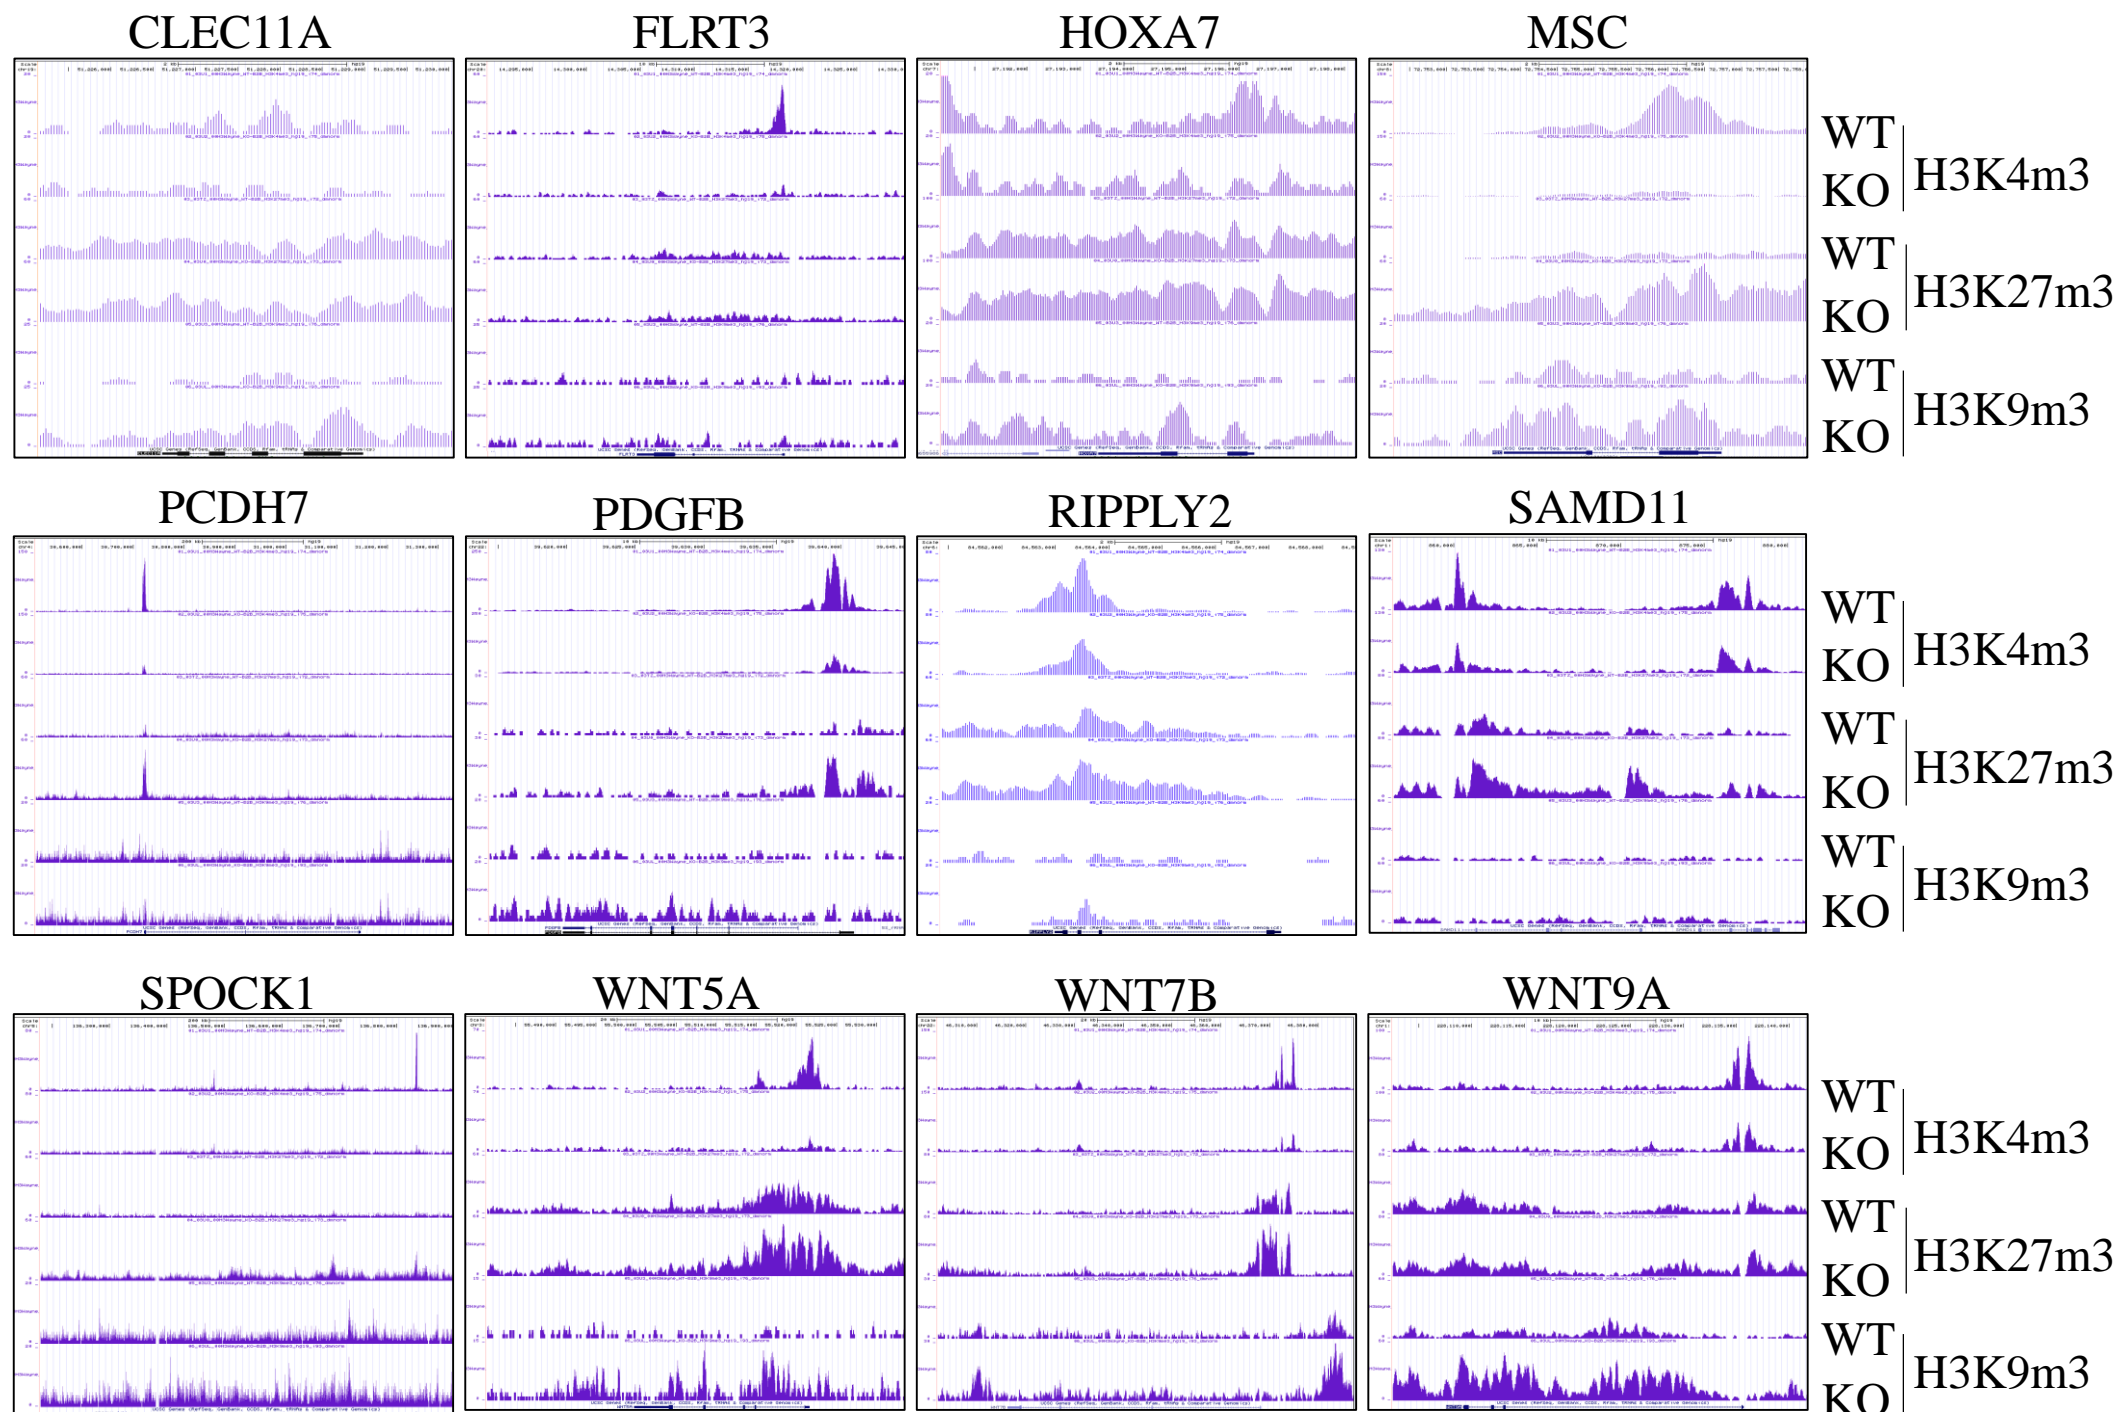

sFig. 5

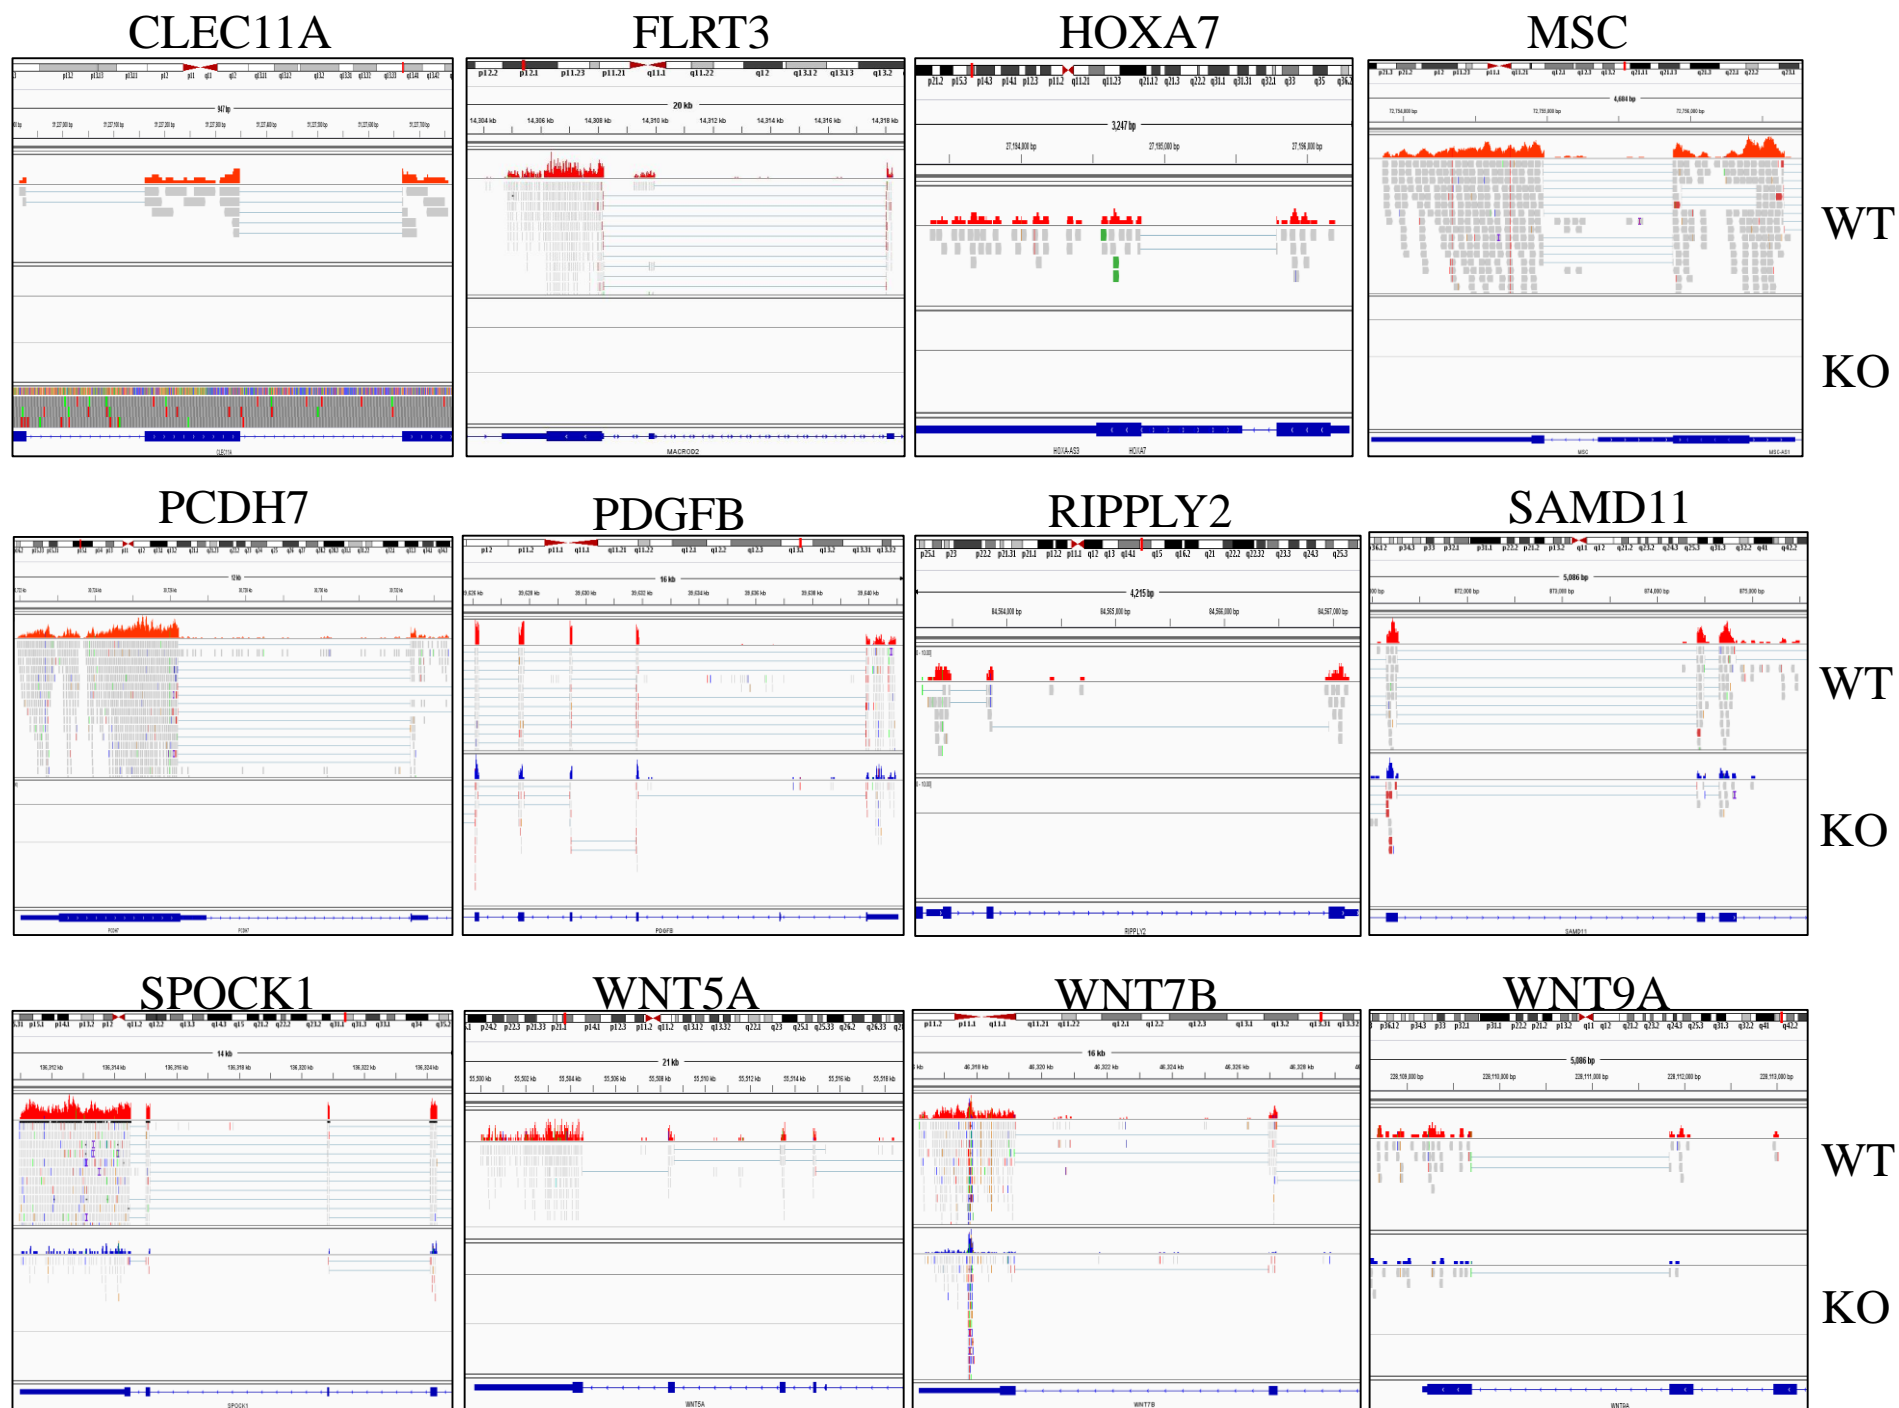



sFig. 6

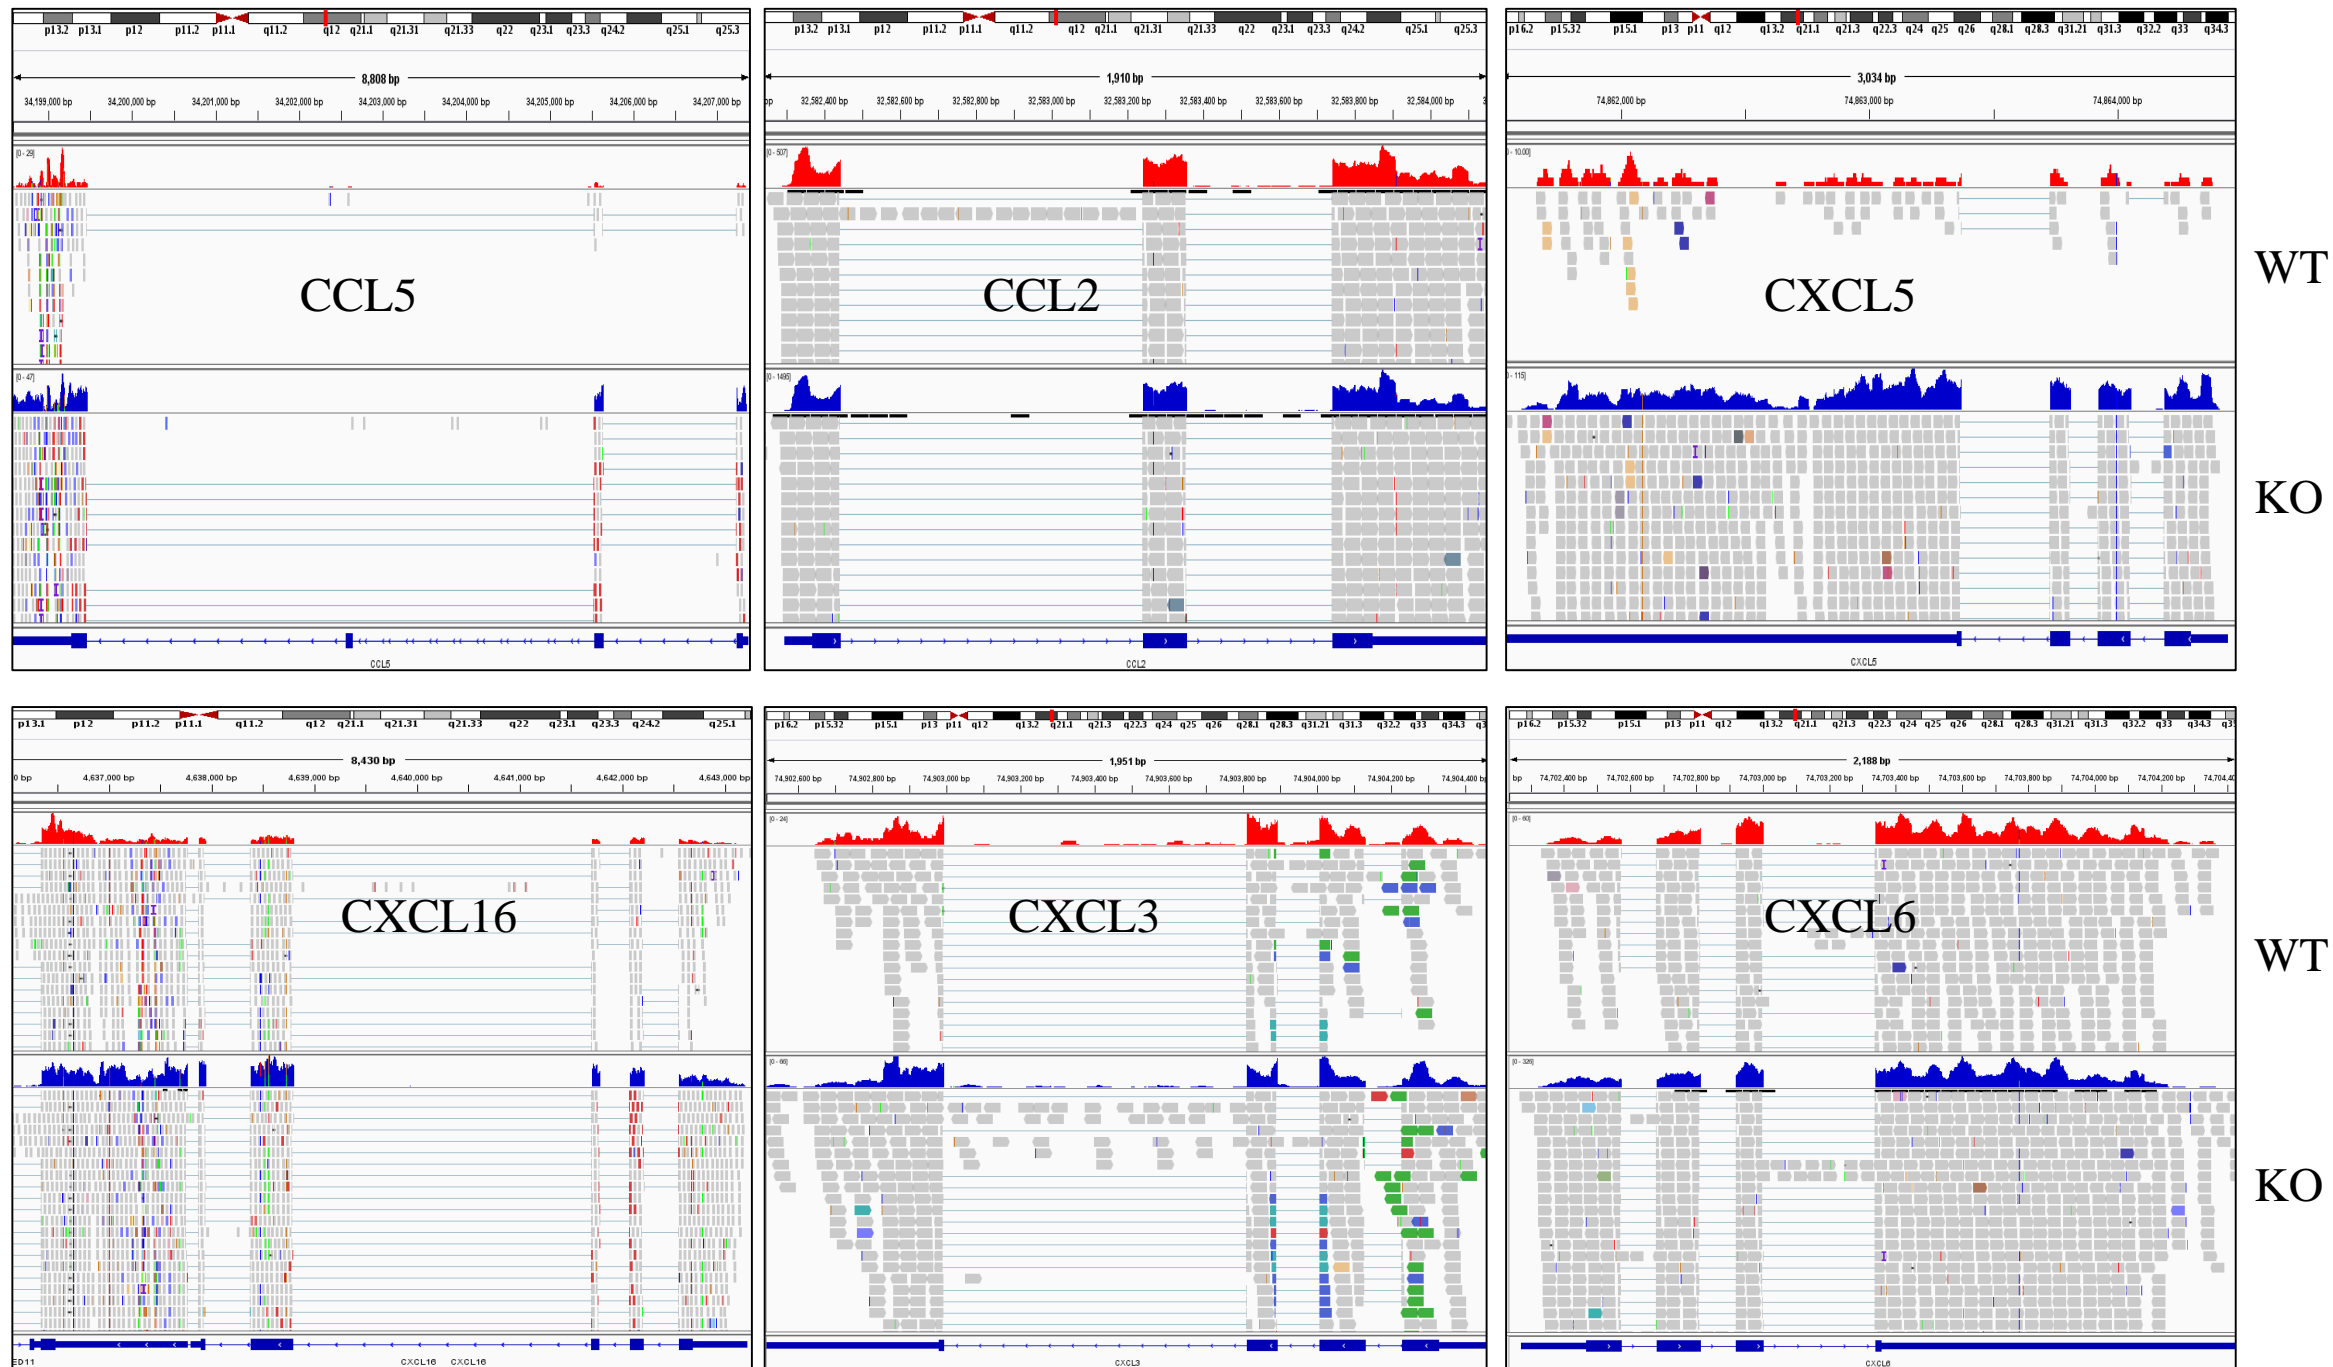

sFig. 7

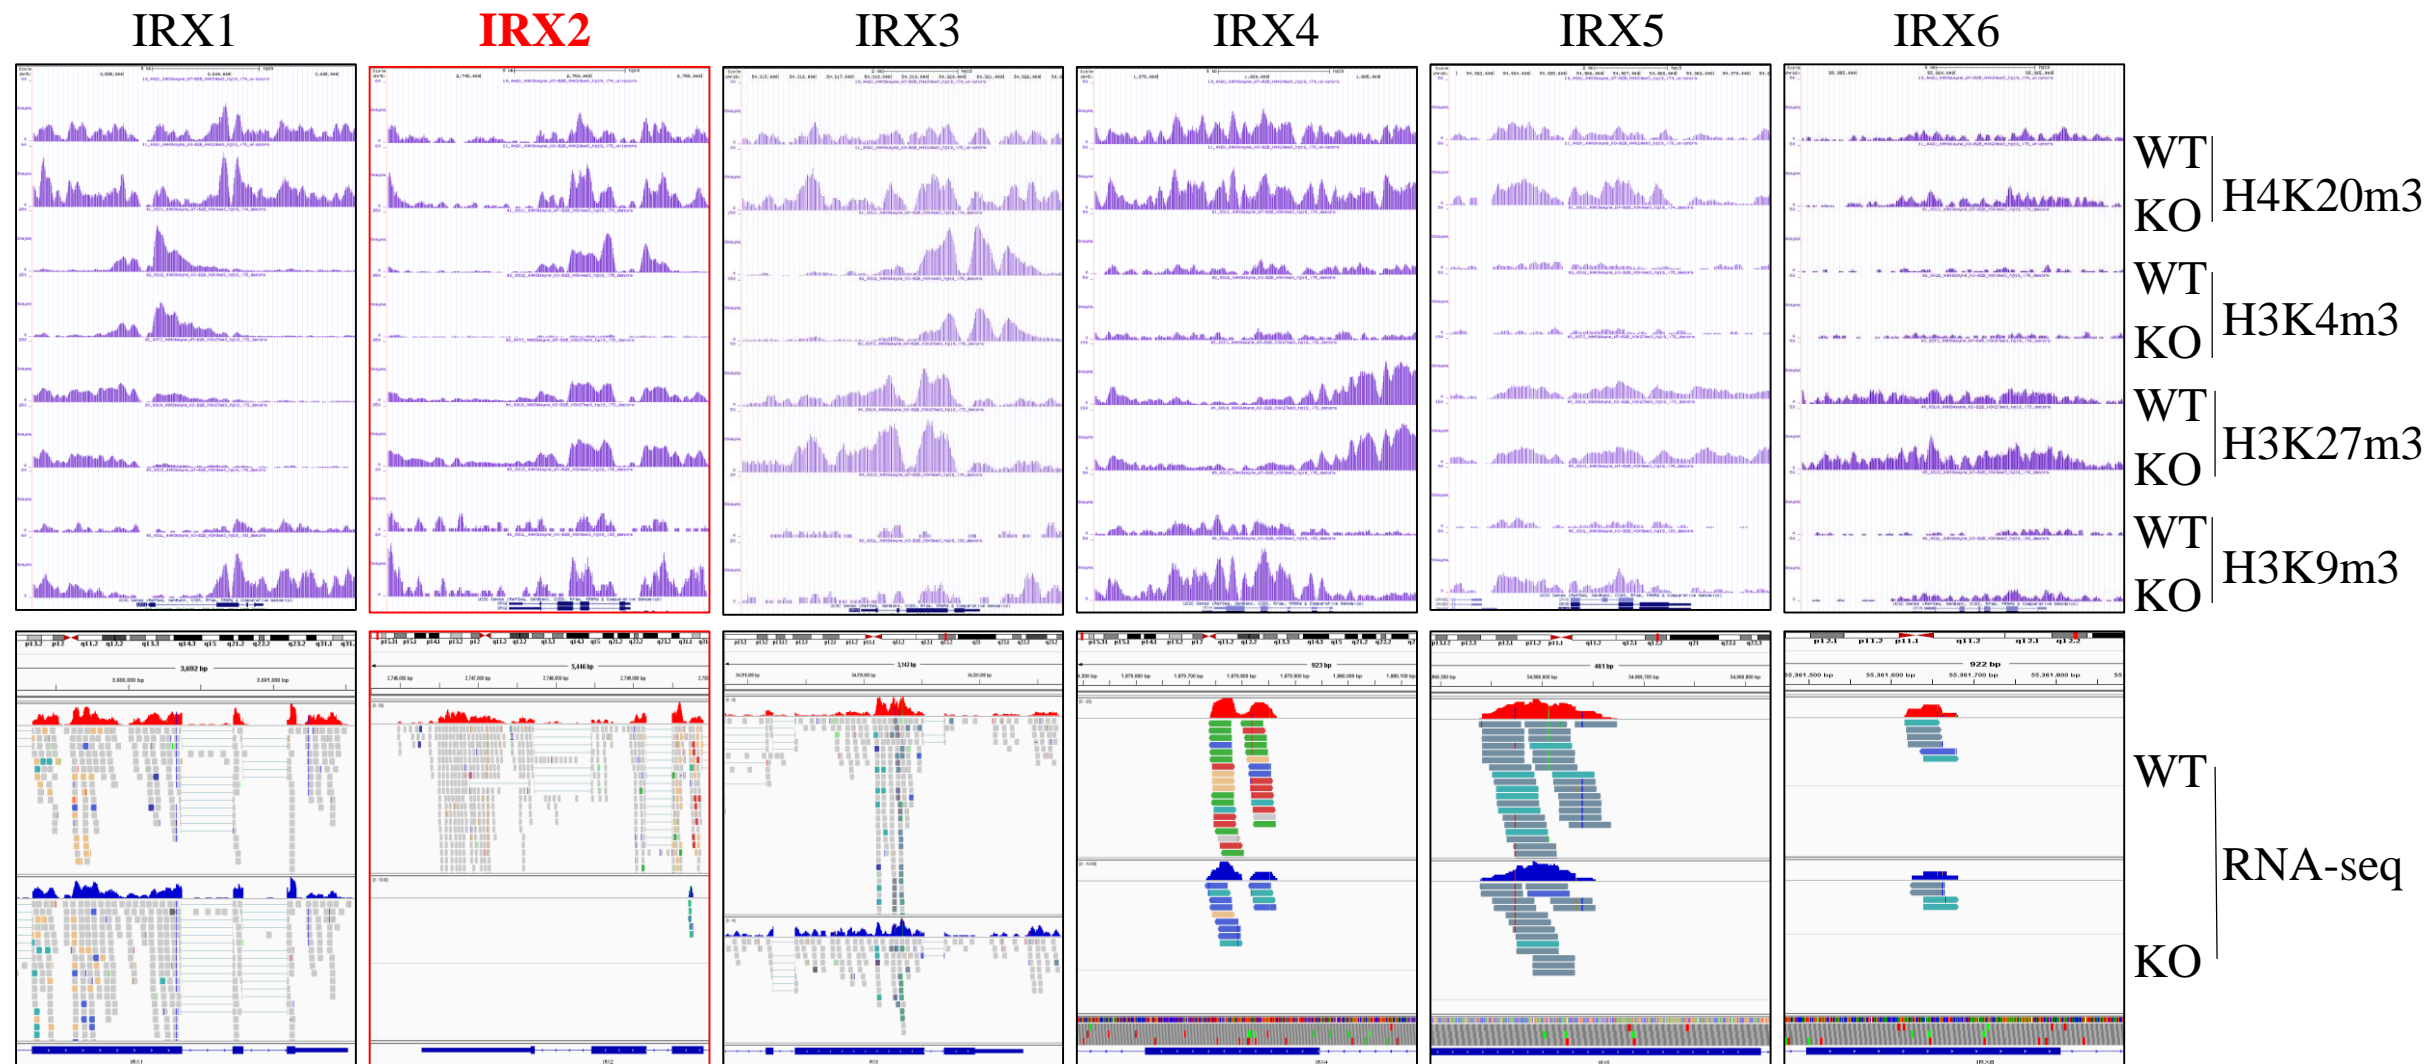

Supplement figure legends:

**sFig. 1.** Establishment of the CRISPR-Cas9-mdig knockout cell lines. **A.** Targeting sequence of the sgRNA used in CRISPR-Cas9 vector for mdig knockout in BEAS-2B cells and MDA-MB-231 cells. Bottom panels show mdig knockout in the screened cell colonies of 2, 3, 4, 5, 6, and 8, but not the colonies of 1 and 7 of the BEAS-2B cells. **B.** RNA-seq diagram shows effective targeting of the CRISPR-Cas9 sgRNA at the exon 2 region of mdig gene in the mdig knockout cells (KO, marked with a red box), but not the cells without successful knockout of mdig (WT). **C.** Profiling of the histone H3 methylation by Westernblotting with antibodies against the mono-, di- and trimethylation of H3K4, H3K9, H3K27, and H3K36, and antibodies against histone H3 and GAPDH, respectively.

**sFig. 2.** ChIP-seq of H3R8me2a. Left panel: average plots of the merged peak regions of H3R8me2a between WT and mdig KO cells. Right panel: Heatmaps of the merged peak of H3R8me2a of the WT and mdig KO cells.

**sFig. 3.** Gene pathway analyses of the genes enriched with the repressive histone methylation markers in the mdig KO cells. An online program, g:Profiler was used for analysis of biological function (A, BP) and molecular function (B, MF), respectively.

**sFig. 4.** Histone methylation profiles of the key genes contributing to cell growth and stemness of the normal or cancer stem cells.

**sFig. 5.** RNA-seq spectrum of the genes listed in sFig. 3.

**sFig. 6.** RNA-seq spectrums of the indicated chemokines as detected in WT and mdig KO cells, respectively.



**sFig. 7.** Histone methylation profiles of the IRX gene family members and their RNA-seq expression between WT and mdig KO cells. No H3K4me3 peaks were detected for IRX4, IRX5 and IRX6, which correlates with their overall lower expression in RNA-seq in both WT and KO cells. IRX1, IRX2 and IRX3 showed significant enrichment of H3K9me3 and decrease of H3K4me3 in the KO cells. However, only IRX2 exhibited complete loss of H3K4me3 and RNA-seq expression in the KO cells.

|                         |      |
|-------------------------|------|
| AURKC <sup>1</sup>      | -2.6 |
| BICC1 <sup>2</sup>      | -7.1 |
| CLEC11A <sup>3</sup>    | -10  |
| CRISPLD1 <sup>4</sup>   | -20  |
| FGFR2 <sup>5</sup>      | -2.4 |
| FLRT3 <sup>6</sup>      | -20  |
| HLF <sup>7</sup>        | -2.1 |
| HOXA7 <sup>8</sup>      | -10  |
| ISL1 <sup>9</sup>       | -2   |
| KIT <sup>10</sup>       | -4   |
| MSC <sup>11</sup>       | -20  |
| PCDH7 <sup>12</sup>     | -20  |
| PDGFB <sup>13</sup>     | -3   |
| PDGFRA <sup>14</sup>    | -2.2 |
| RIPPLY2 <sup>15</sup>   | -10  |
| S1PR1 <sup>16</sup>     | -3.8 |
| SAMD11 <sup>17,18</sup> | -2.3 |
| SOX4 <sup>19</sup>      | -3.6 |
| SPOCK1 <sup>20</sup>    | -7.8 |
| SPOCK3 <sup>21</sup>    | -3.5 |
| WNT5A <sup>22</sup>     | -20  |
| WNT7B <sup>23</sup>     | -2.6 |
| WNT9A <sup>24</sup>     | -2.2 |

- 1 Quartuccio, S. M. & Schindler, K. Functions of Aurora kinase C in meiosis and cancer. *Front Cell Dev Biol* **3**, 50 (2015).
- 2 Lemaire, L. A. *et al.* Bicaudal C1 promotes pancreatic NEUROG3+ endocrine progenitor differentiation and ductal morphogenesis. *Development* **142**, 858-870 (2015).
- 3 Yue, R., Shen, B. & Morrison, S. J. Clec11a/osteolectin is an osteogenic growth factor that promotes the maintenance of the adult skeleton. *Elife* **5** (2016).
- 4 Holmfeldt, P. *et al.* Functional screen identifies regulators of murine hematopoietic stem cell repopulation. *J Exp Med* **213**, 433-449 (2016).
- 5 Coutu, D. L. & Galipeau, J. Roles of FGF signaling in stem cell self-renewal, senescence and aging. *Aging (Albany NY)* **3**, 920-933 (2011).
- 6 Muller, P. S. *et al.* The fibronectin leucine-rich repeat transmembrane protein Flrt2 is required in the epicardium to promote heart morphogenesis. *Development* **138**, 1297-1308 (2011).

- 7 Komorowska, K. *et al.* Hepatic Leukemia Factor Maintains Quiescence of Hematopoietic Stem  
Cells and Protects the Stem Cell Pool during Regeneration. *Cell Rep* **21**, 3514-3523 (2017).
- 8 Wheadon, H. *et al.* Differential Hox expression in murine embryonic stem cell models of normal  
and malignant hematopoiesis. *Stem Cells Dev* **20**, 1465-1476 (2011).
- 9 Bartulos, O. *et al.* ISL1 cardiovascular progenitor cells for cardiac repair after myocardial  
infarction. *JCI Insight* **1** (2016).
- 10 Ross, R. A., Walton, J. D., Han, D., Guo, H. F. & Cheung, N. K. A distinct gene expression signature  
characterizes human neuroblastoma cancer stem cells. *Stem Cell Res* **15**, 419-426 (2015).
- 11 Hishikawa, K. *et al.* Musculin/MyoR is expressed in kidney side population cells and can regulate  
their function. *J Cell Biol* **169**, 921-928 (2005).
- 12 Soady, K. J. *et al.* Mouse mammary stem cells express prognostic markers for triple-negative  
breast cancer. *Breast Cancer Res* **17**, 31 (2015).
- 13 Chen, W. *et al.* PDGFB-based stem cell gene therapy increases bone strength in the mouse. *Proc  
Natl Acad Sci U S A* **112**, E3893-3900 (2015).
- 14 Farahani, R. M. & Xaymardan, M. Platelet-Derived Growth Factor Receptor Alpha as a Marker of  
Mesenchymal Stem Cells in Development and Stem Cell Biology. *Stem Cells Int* **2015**, 362753  
(2015).
- 15 Chan, T. *et al.* Ripply2 is essential for precise somite formation during mouse early development.  
*FEBS Lett* **581**, 2691-2696 (2007).
- 16 Li, M. *et al.* Co-stimulation of LPAR1 and S1PR1/3 increases the transplantation efficacy of  
human mesenchymal stem cells in drug-induced and alcoholic liver diseases. *Stem Cell Res Ther*  
**9**, 161 (2018).
- 17 Jin, G. *et al.* Identification and characterization of novel alternative splice variants of human  
SAMD11. *Gene* **530**, 215-221 (2013).
- 18 Ng, P. M. & Lufkin, T. Embryonic stem cells: protein interaction networks. *Biomol Concepts* **2**, 13-  
25 (2011).
- 19 Shen, H. *et al.* Sox4 Expression Confers Bladder Cancer Stem Cell Properties and Predicts for  
Poor Patient Outcome. *Int J Biol Sci* **11**, 1363-1375 (2015).
- 20 Shu, Y. J. *et al.* SPOCK1 as a potential cancer prognostic marker promotes the proliferation and  
metastasis of gallbladder cancer cells by activating the PI3K/AKT pathway. *Mol Cancer* **14**, 12  
(2015).
- 21 Hawkins, F. *et al.* Prospective isolation of NKX2-1-expressing human lung progenitors derived  
from pluripotent stem cells. *J Clin Invest* **127**, 2277-2294 (2017).
- 22 Zhou, Y., Kipps, T. J. & Zhang, S. Wnt5a Signaling in Normal and Cancer Stem Cells. *Stem Cells Int*  
**2017**, 5295286 (2017).
- 23 Valkenburg, K. C., Graveel, C. R., Zylstra-Diegel, C. R., Zhong, Z. & Williams, B. O. Wnt/beta-  
catenin Signaling in Normal and Cancer Stem Cells. *Cancers (Basel)* **3**, 2050-2079 (2011).
- 24 Grainger, S. *et al.* Wnt9a Is Required for the Aortic Amplification of Nascent Hematopoietic Stem  
Cells. *Cell Rep* **17**, 1595-1606 (2016).
